# Supplementary material for: Does Urinary Incontinence and Mode of Delivery Affect Postpartum Depression? A Nationwide Population-Based Cohort Study in Korea
Source: MDPI journal article supplement (doi:10.3390/ijerph18020437), 2021-01-08

## Supplementary file

Supplementary Figure 1. Cumulative incidence curves for the occurrence of postpartum depression with urinary incontinence within 12 weeks of delivery.

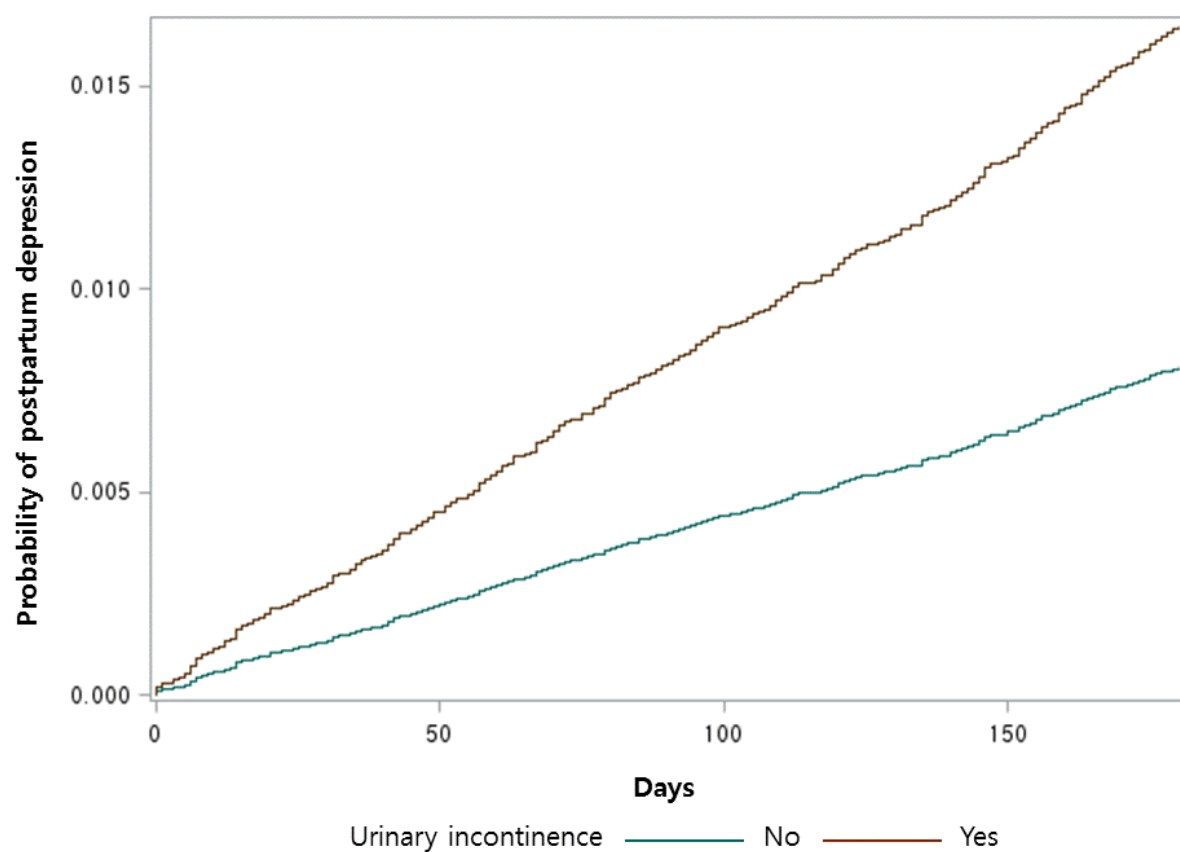

Supplement: s1 [file s1]
